# Supplementary material for: Identifying Novel Types of Irritability Using a Developmental Genetic Approach
Source: Atypon-hosted journal article supplement (doi:10.1176/appi.ajp.2019.18101134), 2019-07-01
Supplement: appi.ajp.2019.18101134.ds001.pdf [file appi.ajp.2019.18101134.ds001.pdf]

 


Psychiatry Online
